# Supplementary material
Source: MDPI journal article supplement (https://www.mdpi.com/2073-4344/10/11/1313)
Supplement: s1 [file s1]

Supplementary Material

# Biotechnological Approach for the Production of Enantiomeric Hydroxylactones Derived from Benzaldehyde and Evaluation of Their Cytotoxic Activity

Marcelina Mazur <sup>1,\*</sup>, Anna Kudrynska <sup>1</sup>, Aleksandra Pawlak <sup>2</sup>, Beatriz Hernandez-Suarez <sup>2</sup>, Bożena Obmińska-Mrukowicz <sup>2</sup> and Witold Gładkowski <sup>1</sup>

<sup>1</sup> Department of Chemistry, Wrocław University of Environmental and Life Sciences, Norwida 25, 50-375 Wrocław, Poland; aaahhaaa@ukr.net (A.K.); witold.gladkowski@upwr.edu.pl (W.G.)

<sup>2</sup> Department of Pharmacology and Toxicology, Wrocław University of Environmental and Life Sciences, Norwida 31, 50-375 Wrocław, Poland; aleksandra.pawlak@upwr.edu.pl (A.P.); beatriz.hernandez-suarez@upwr.edu.pl (B.H.-S.); bozena.obminska-mrukowicz@upwr.edu.pl (B.O.-M.)

\* Correspondence: marcelina.mazur@upwr.edu.pl (M.M.); Tel.: +48-713205197

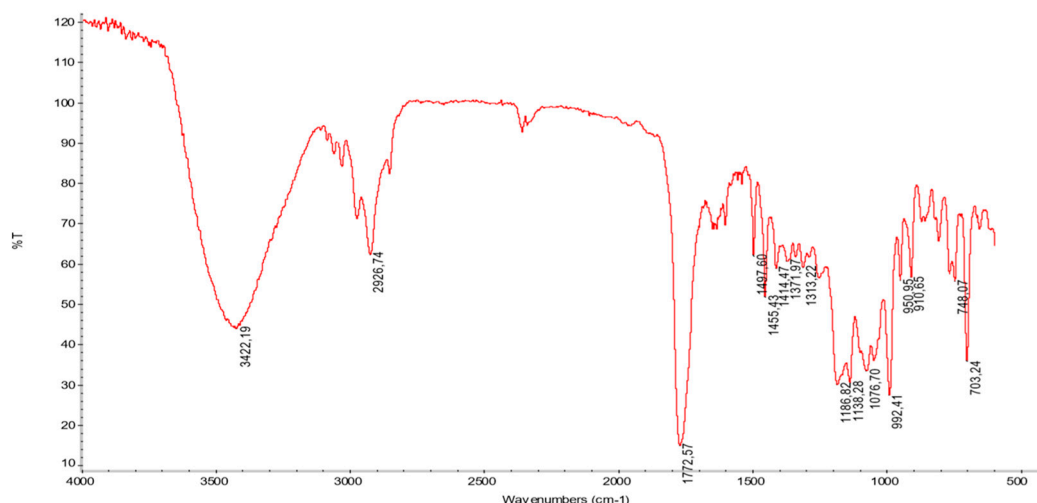

**Figure S1.** IR spectrum of lactone **2**.

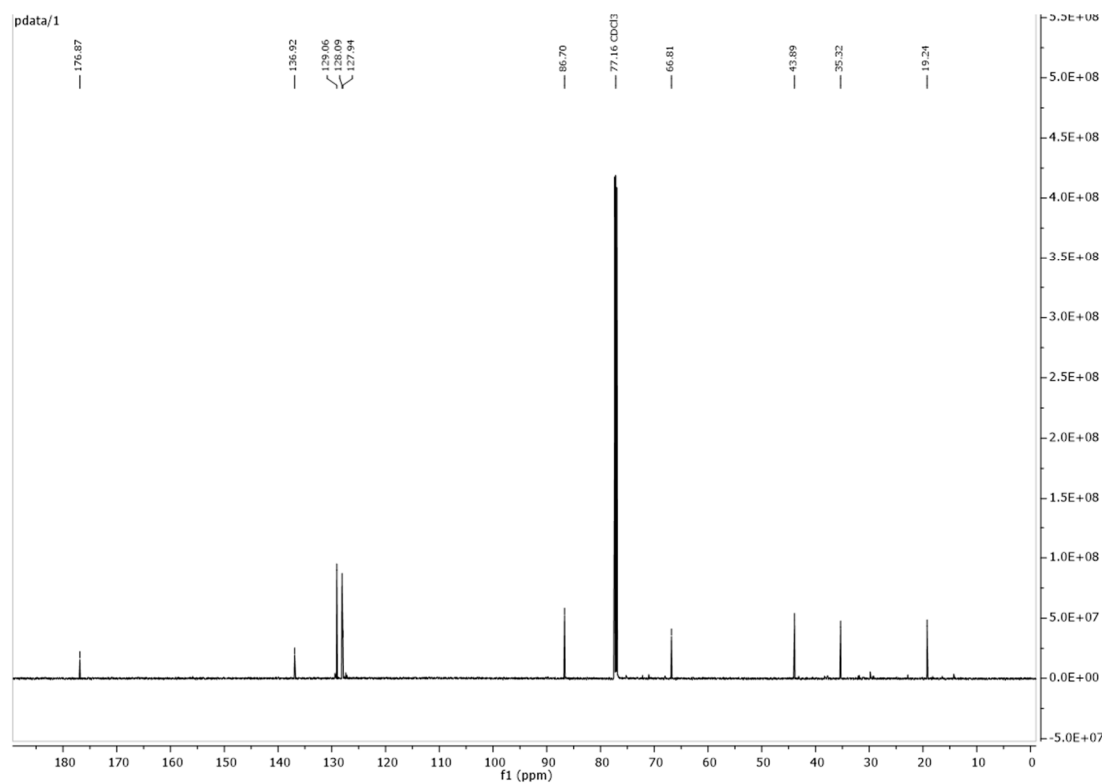Figure S2.  $^{13}\text{C}$ -NMR spectrum of lactone 2.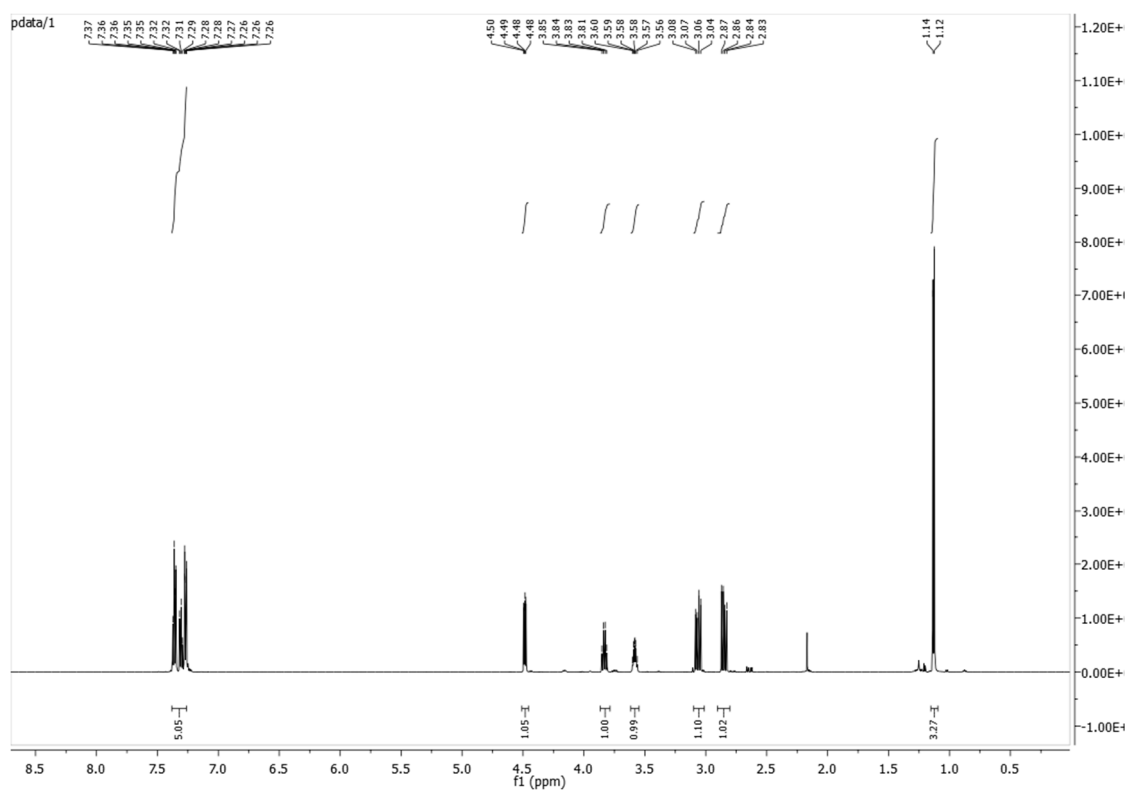

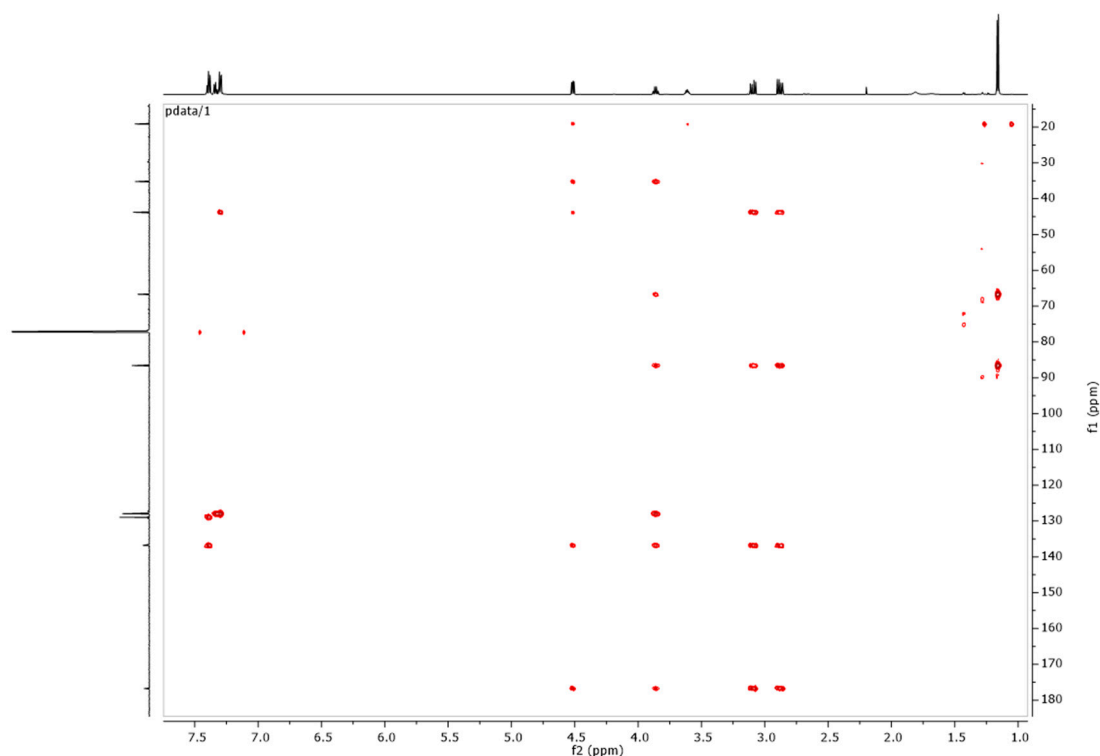

Figure S4. HMBC spectrum of lactone 2.

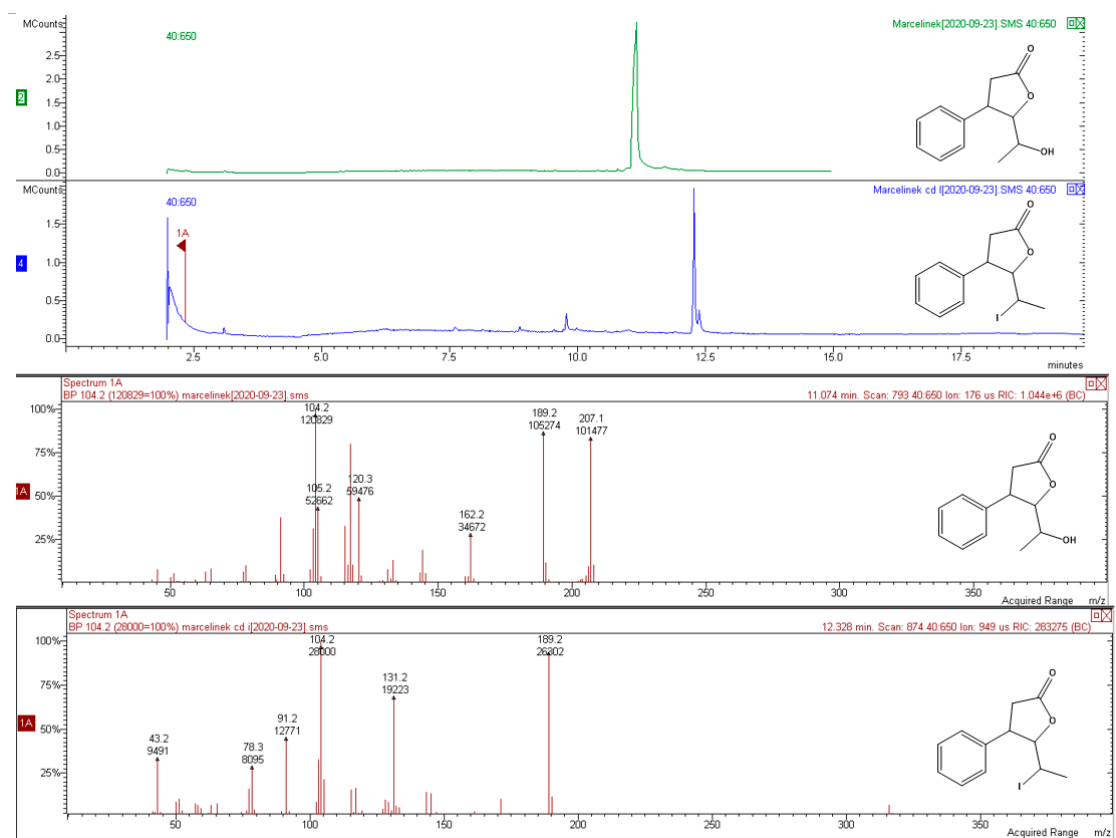

Figure S5. The comparison of GC-MS analysis of iodolactone 1 and hydroxylactone 2.
